# Supplementary material for: Deacetylation of Glutaminase by HDAC4 contributes to Lung Cancer Tumorigenesis
Source: PubMed Central journal article supplement (PMC9295053; doi:10.7150/ijbs.69882), 2022-07-04
Supplement: ijbsv18p4452s1.pdf [file ijbsv18p4452s1.pdf]

**Table. S1** Identification of GAC interacting E3 ligase.

| Reference | Score  | Area    | MV   |
|-----------|--------|---------|------|
| GAC       | 156.81 | 2.271E9 | 61.0 |
| XIAP      | 10.23  | 8.901E6 | 56.6 |
| TRIM21    | 6.27   | 1.043E7 | 54.1 |

**Table. S1 Identification of GAC interacting E3 ligase.** GAC interacting proteins involved in ubiquitination were shown.

## Figure S1

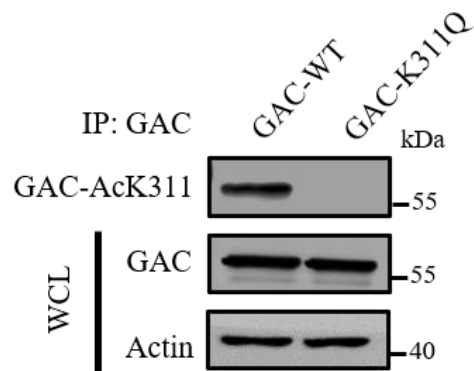

**Fig. S1 Verification of the specificity of GAC-K311Ac antibody.** Indicated plasmids were transfected into H1299 cells. GAC acetylation was detected by immunoprecipitation and western blot assay were performed. WCL: whole cell lysate.

**Figure S2**

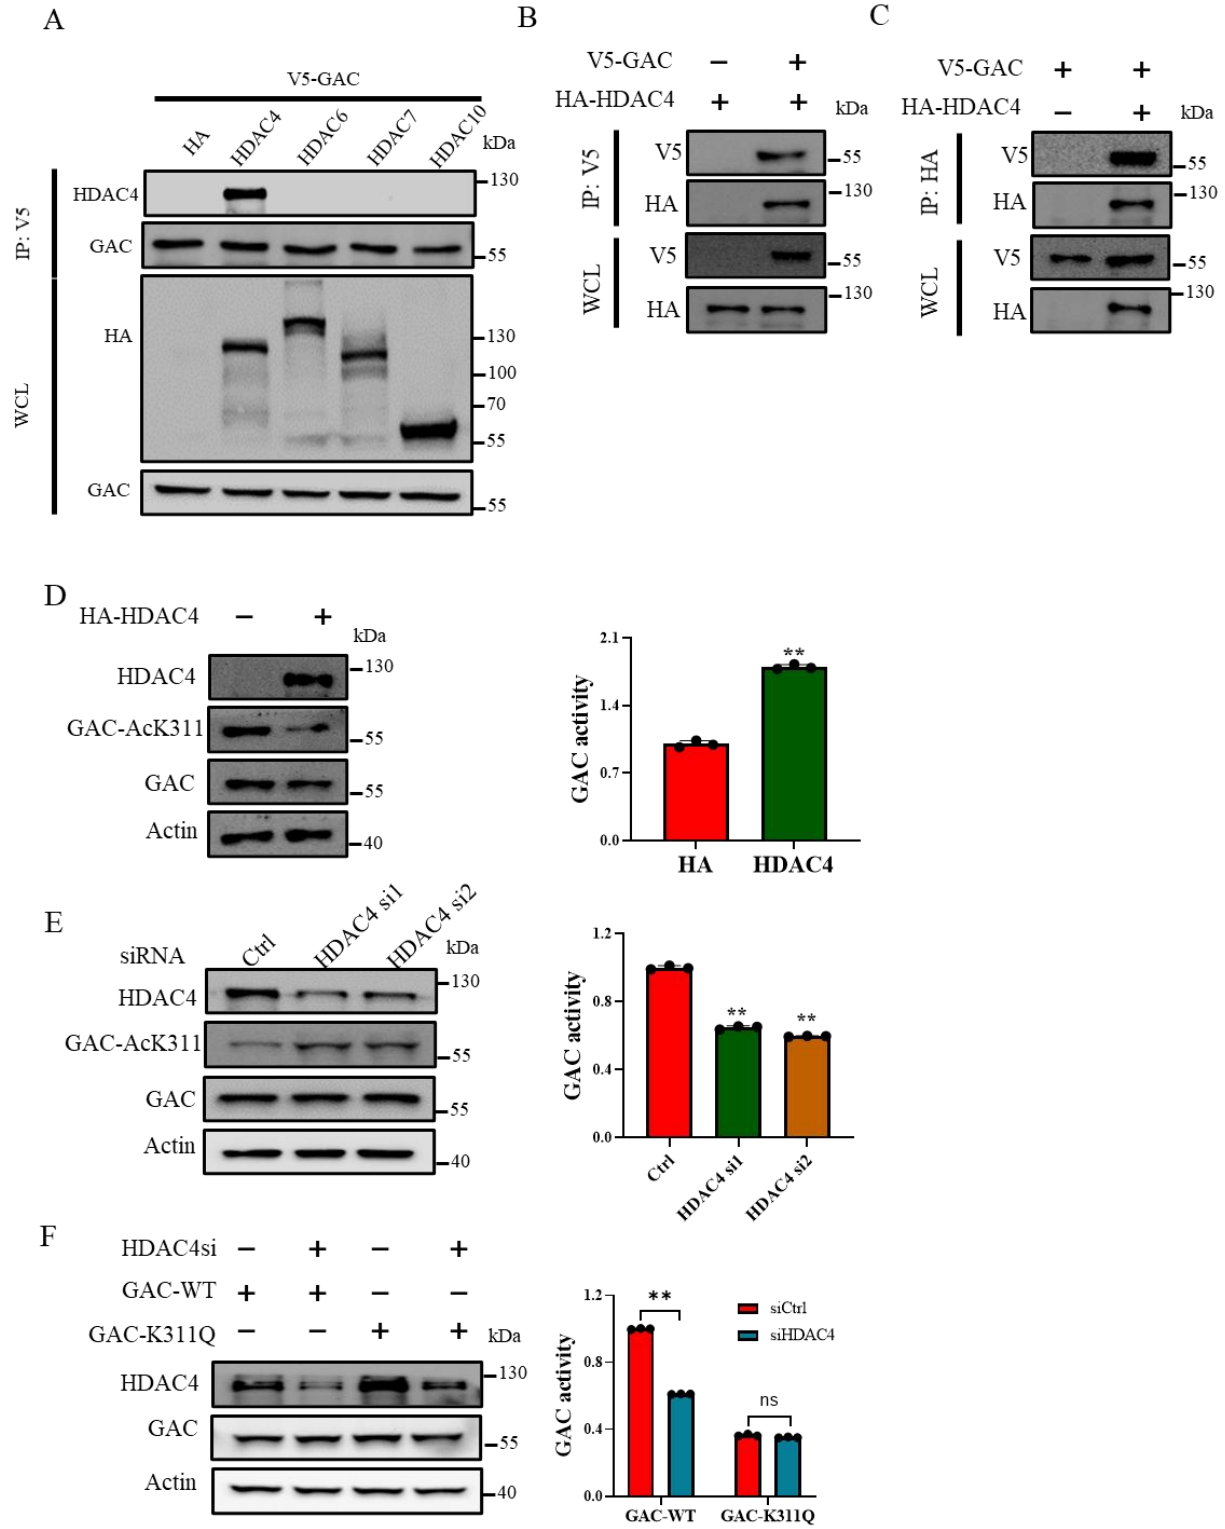

**Fig. S2 HDAC4 is responsible for deacetylation of GAC at K311.** A Indicated plasmids were transfected into 293T cells. Interaction between HDACs and GAC was detected by immunoprecipitation and western blot. B, C Indicated plasmids were transfected into A549 cells. Interaction between HDAC4 and GAC was detected by immunoprecipitation and western blot. WCL: whole cell lysate. D Indicated plasmids were transfected into A549 cells. The protein expressions were determined by western blot and glutaminase activity assay was performed. E Indicated siRNAs were transfected into A549 cells. The protein expressions were determined by western blot and glutaminase activity assay was performed. F Indicated plasmids and siRNAs were transfected into A549 cells. Cell lysates were immunoprecipitated with anti-V5 antibody and then glutaminase activity assay was performed. Data are showed as mean  $\pm$  SD, n=3. \*\* $P < 0.01$ , ns  $P > 0.05$ .

### Figure S3

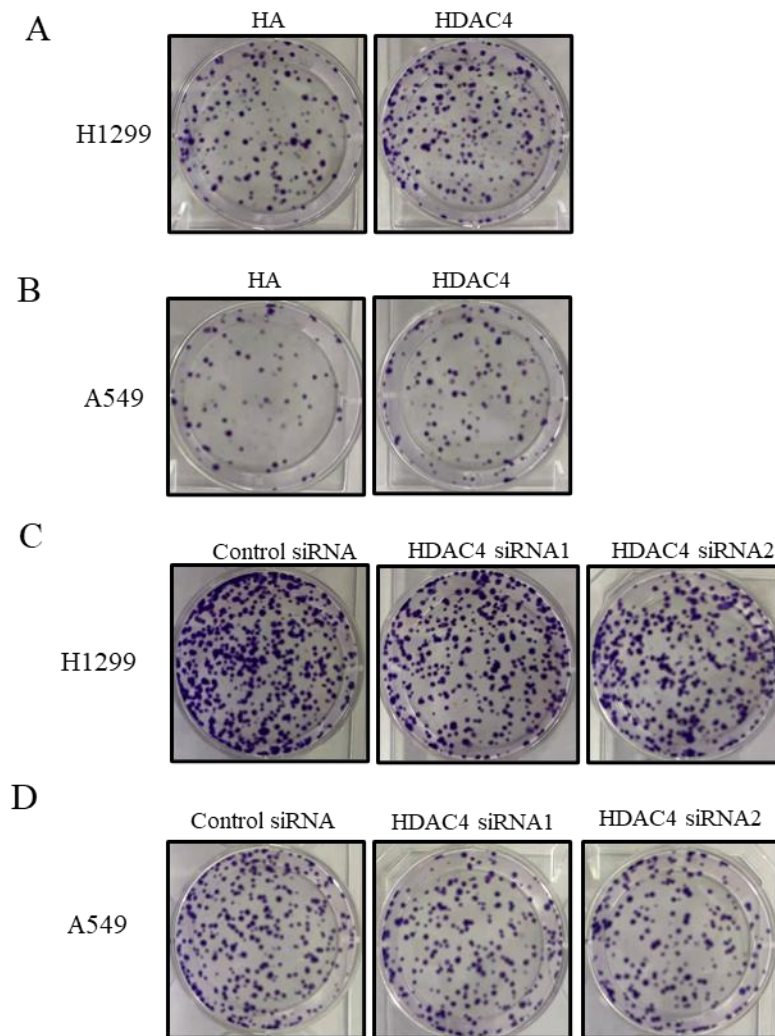

**Fig. S3 HDAC4 promotes cell proliferation in NSCLC.** A-D Indicated plasmids or siRNAs were transfected into NSCLC cells (H1299 and A549). 24h later, Cells were counted and seeded in 6-well plates and colony formation assay was performed.

## Figure S4

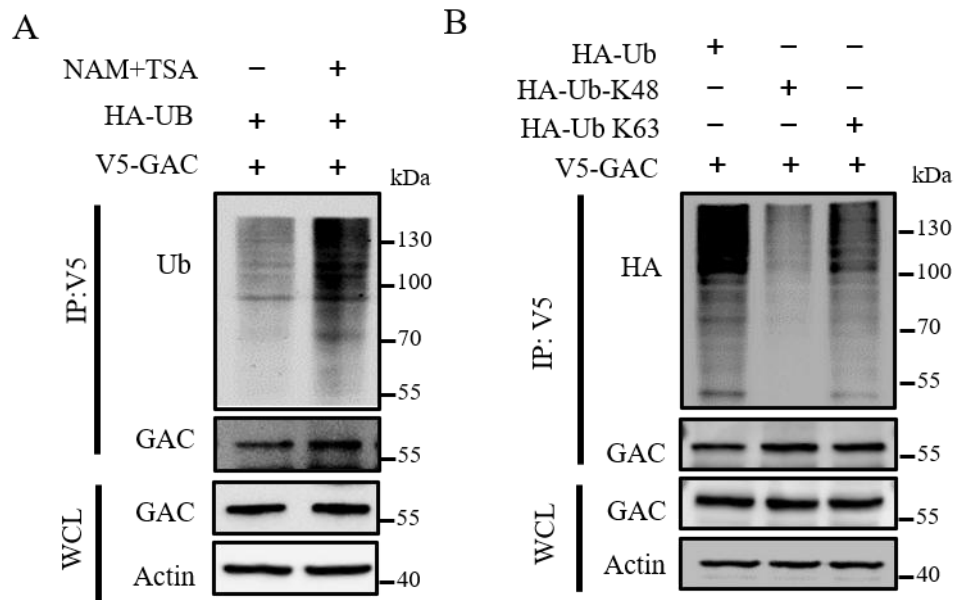

**Fig. S4 Ubiquitination of GAC.** A Indicated plasmids were transfected into H1299 cells followed by treatment with or without NAM and TSA. The levels of GAC ubiquitination were detected by immunoprecipitation and western blot assay. B Indicated plasmids were transfected into H1299 cells. The type of GAC ubiquitination was detected by immunoprecipitation and western blot assay. WCL: whole cell lysate.

**Figure S5**

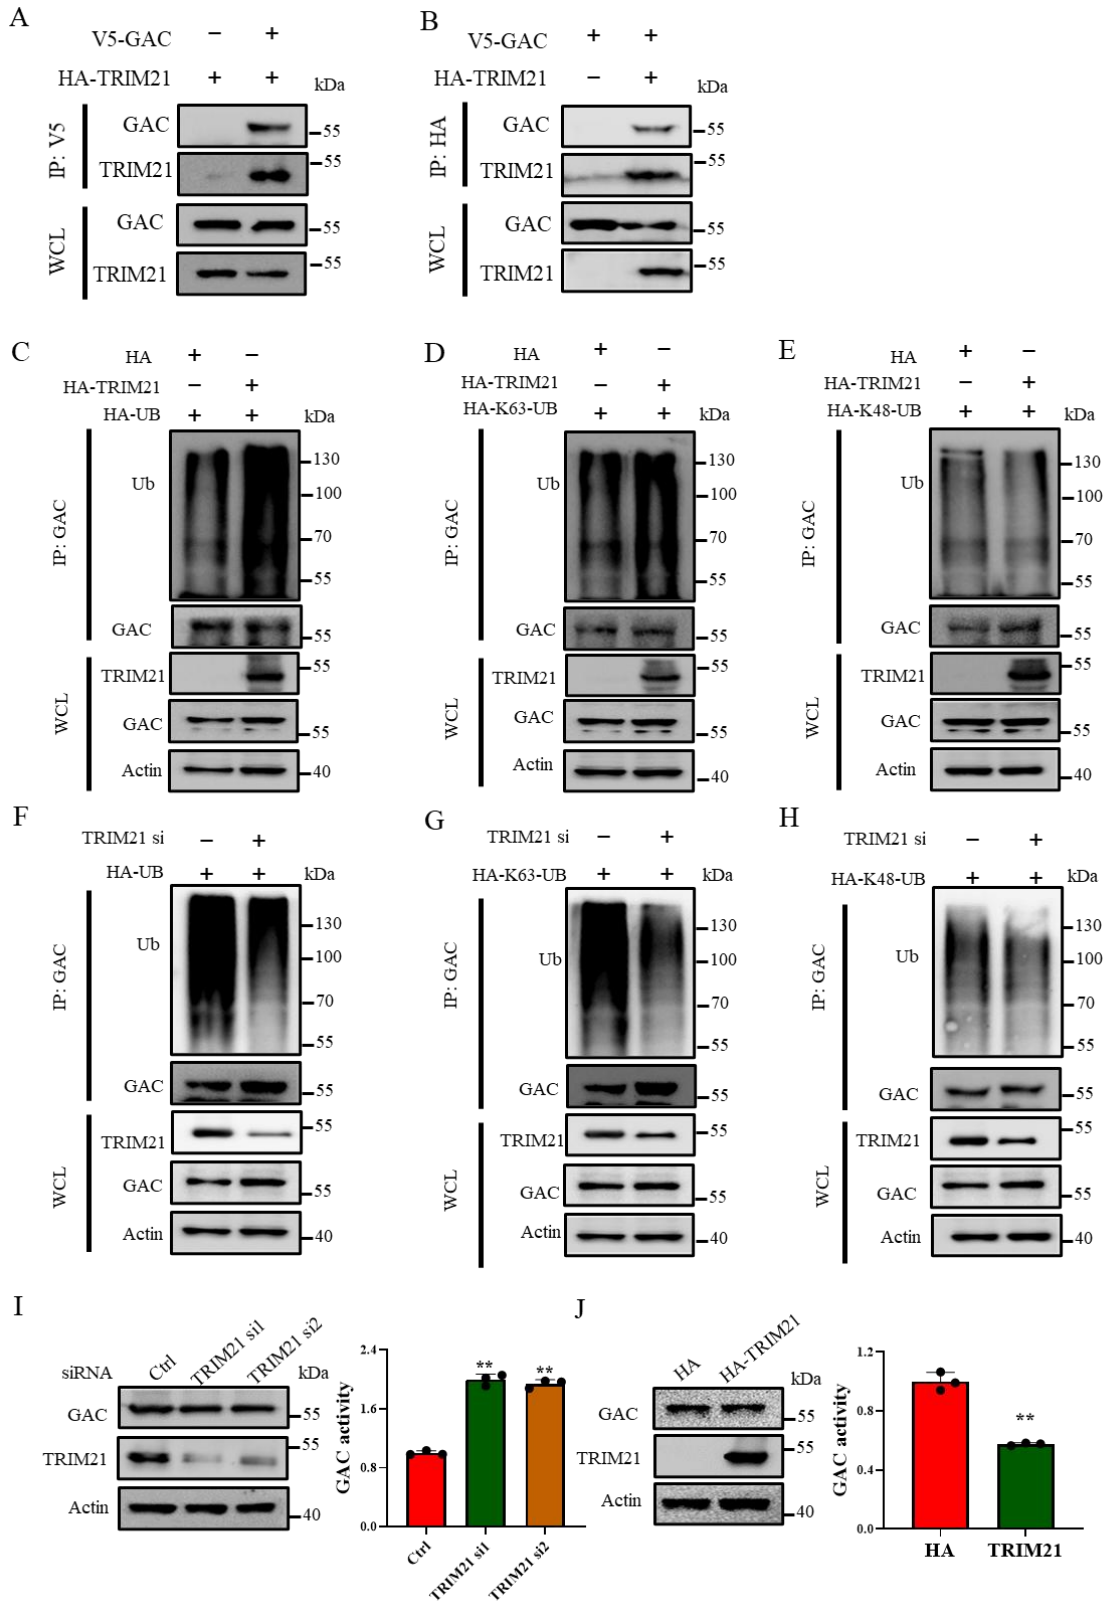

**Supplementary Fig. S5 TRIM21 is the E3 ligase for GAC.** A, B Indicated plasmids were transfected into A549 cells. Interaction between TRIM21 and GAC was detected by immunoprecipitation and western blot. C-E Indicated plasmids were transfected into A549 cells. The levels of GAC ubiquitination were detected by immunoprecipitation and western blot assay. F-H Indicated plasmids and siRNAs were transfected into A549 cells. The levels of GAC ubiquitination were detected by immunoprecipitation and western blot assay. WCL: whole cell lysate. I Indicated siRNAs were transfected into A549 cells. The protein expressions were determined by western blot and glutaminase activity assay was performed. J Indicated plasmids were transfected into A549 cells. The protein expressions were determined by western blot and glutaminase activity assay was performed. Data are showed as mean  $\pm$  SD, n=3. \*\* $P < 0.01$ .



**Figure S6**

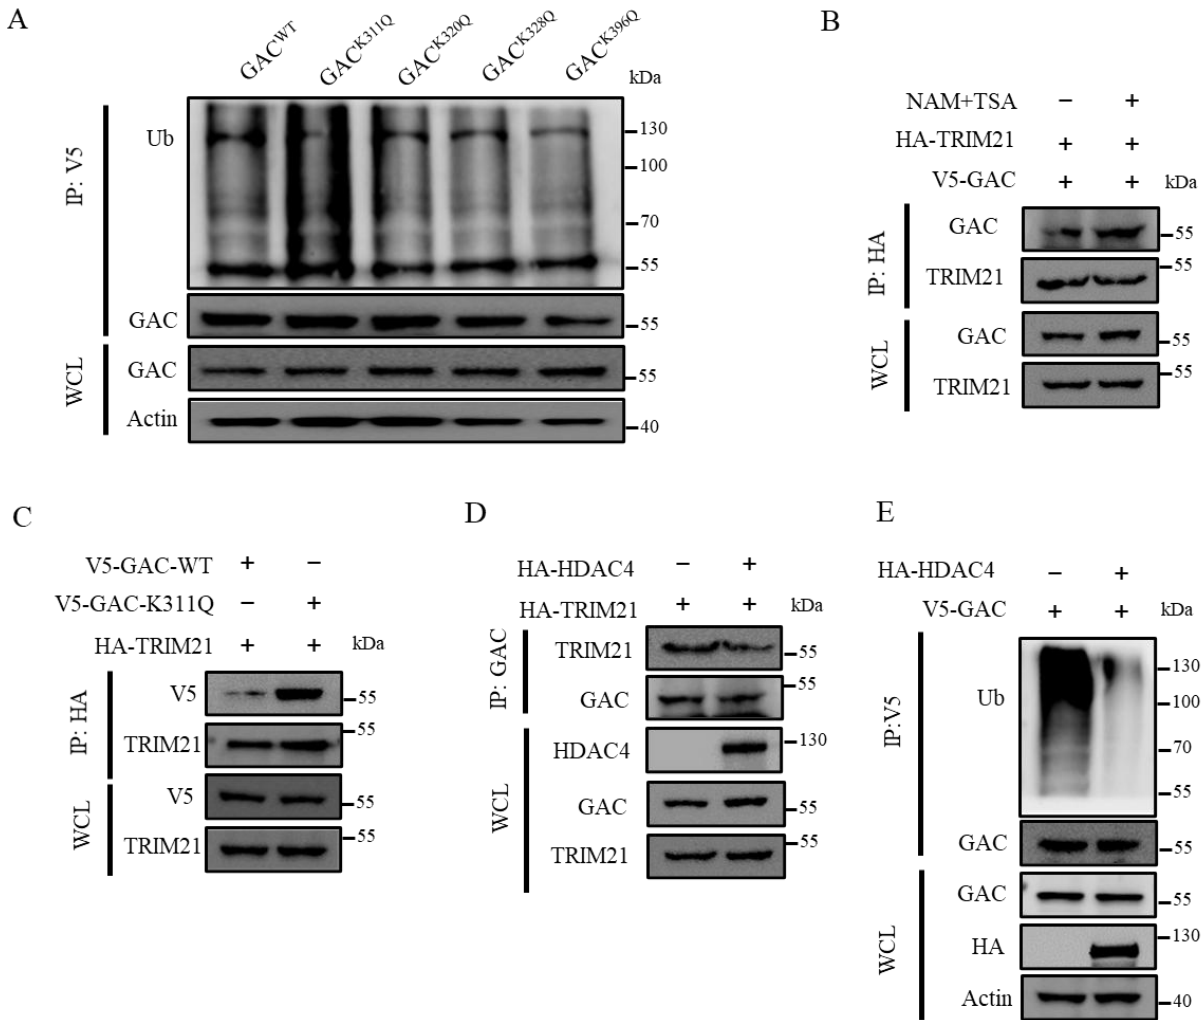

**Fig. S6 Lys311 acetylation promotes GAC-TRIM21 interaction and GAC ubiquitination. A**

Indicated plasmids were transfected into A549 cells. Interaction between TRIM21 and GAC was

detected by immunoprecipitation and western blot. B Indicated plasmids were transfected into

A549 cells followed by treatment with or without NAM and TSA. Interaction between TRIM21

and GAC was detected by immunoprecipitation and western blot. C Indicated plasmids were

transfected into A549 cells. Interaction between TRIM21 and GAC was detected by

immunoprecipitation and western blot. D Indicated plasmids were transfected into A549 cells

Interaction between TRIM21 and GAC was detected by immunoprecipitation and western blot. E  
Indicated plasmids were transfected into A549 cells. The levels of GAC ubiquitination were  
detected by immunoprecipitation and western blot assay. WCL: whole cell lysate.

**Figure S7**

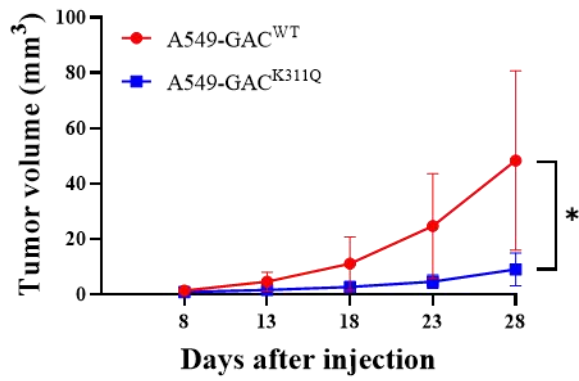

**Fig. S7 Time course changes of tumor volumes.** Nude mice were subcutaneously injected with parental A549-GAC<sup>WT</sup> and A549-GAC<sup>K311Q</sup> stable cells ( $1 \times 10^7$ ). Tumor volumes was measured starting from 8 days after injection. Data are showed as mean  $\pm$  SD, n=6. \* P< 0.05.
